# Supplementary material for: Differential Gene Expression in Porcine Lung Compartments after Experimental Infection with Mycoplasma hyopneumoniae
Source: MDPI journal article supplement (doi:10.3390/ani14091290), 2024-04-25
Supplement: s1 [file s1]

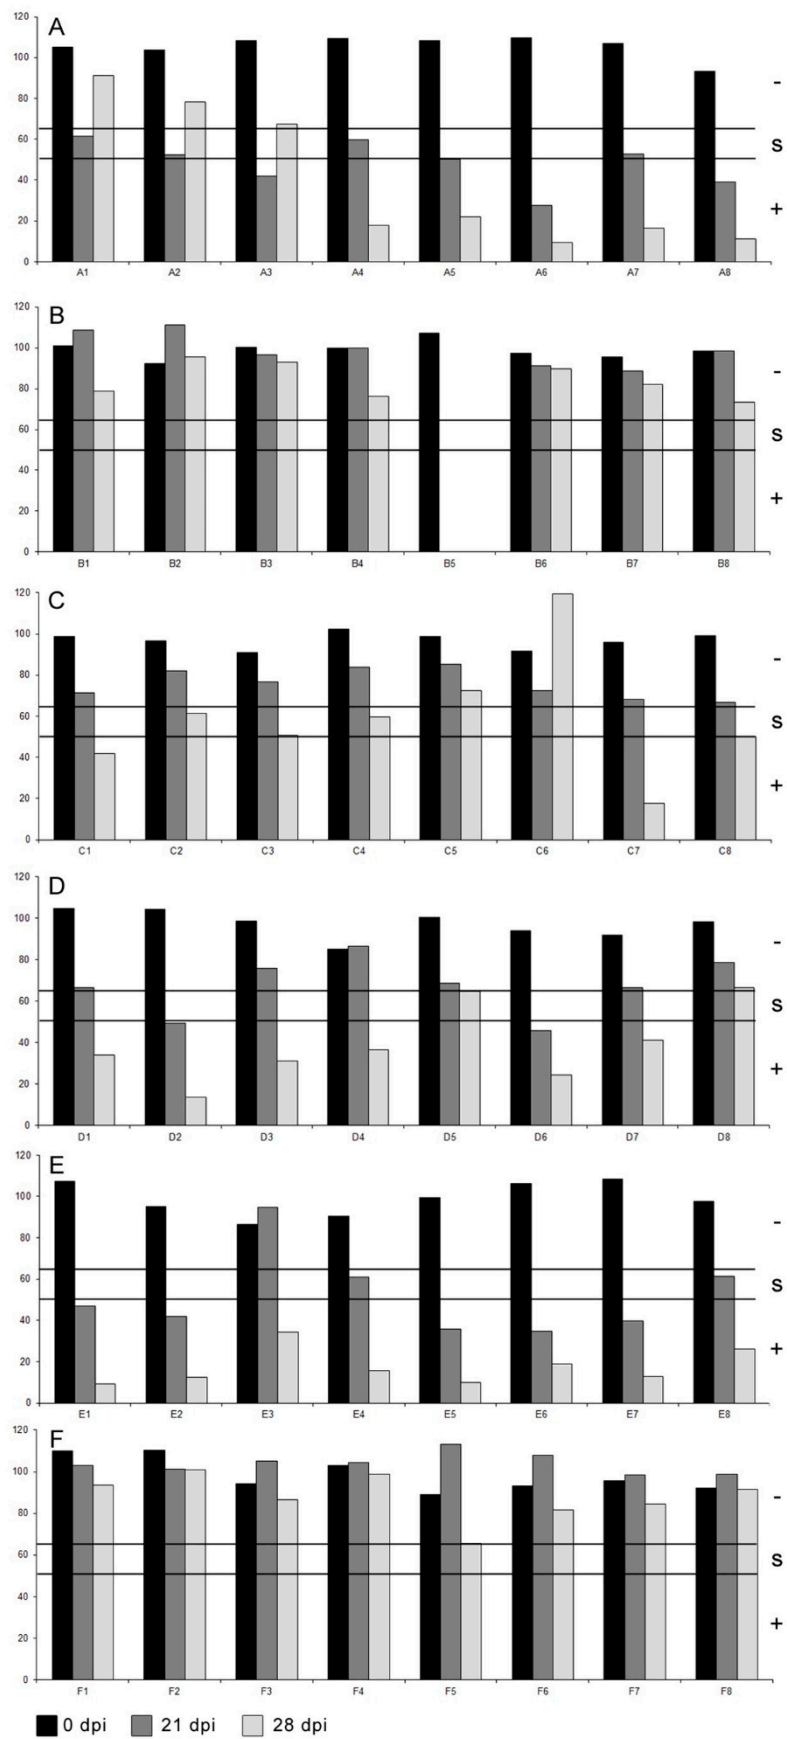

Figure S1: Mhyo blocking ELISA results for animal groups A to F. Y axis represents percentages of optical density (OD) in comparison to the buffer control. -: Negative results (>65%). s: Suspect results (65%-50%). +: Positive results (<50%). Animal ID B5 had to be euthanized at 10 dpi based on the humane endpoint scoring sheet associated to this animal study. Non-specific clinical signs and moderate respiratory distress were observed prior to the euthanasia of the animal. Post-mortem examination did not reveal specific pathological changes. Mhyo was the sole porcine pathogen isolated from the respiratory tract.
